# Supplementary material for: High Performance Software Framework for the Calculation of Satellite-to-Satellite Data Matchups (MMS version 1.2)
Source: Copernicus journal article supplement (doi:10.5194/gmd-2017-54), 2017-05-31
Supplement: Supplementary file 1 [file gmd-2017-54-supplement.pdf]

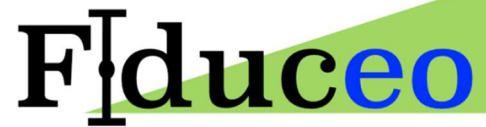

# FIDUCEO Multi-sensor Match up System (MMS) Manual

---

**Tom Block, Sabine Embacher**

Brockmann Consult GmbH

**1/17/2017**

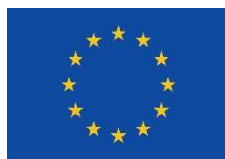

FIDUCEO has received funding from the European Union's Horizon 2020 Programme for Research and Innovation, under Grant Agreement no. 638822

# FIDUCEO Multi-sensor Match up System (MMS) V 1.2 Manual

---

## 1 Content

|        |                                           |    |
|--------|-------------------------------------------|----|
| 2      | Introduction .....                        | 4  |
| 2.1    | Scope.....                                | 4  |
| 2.2    | Version Control .....                     | 4  |
| 2.3    | Software Changelog .....                  | 4  |
| 2.3.1  | Updates from version 1.2.0 to 1.2.1 ..... | 4  |
| 2.3.2  | Updates from version 1.1.3 to 1.2.0 ..... | 4  |
| 2.3.3  | Updates from version 1.1.2 to 1.1.3 ..... | 4  |
| 2.3.4  | Updates from version 1.1.1 to 1.1.2 ..... | 4  |
| 2.3.5  | Updates from version 1.1.0 to 1.1.1 ..... | 5  |
| 2.3.6  | Updates from version 1.0.5 to 1.1.0 ..... | 5  |
| 2.3.7  | Updates from version 1.0.4 to 1.0.5 ..... | 5  |
| 2.3.8  | Updates from version 1.0.3 to 1.0.4 ..... | 5  |
| 2.3.9  | Updates from version 1.0.2 to 1.0.3 ..... | 5  |
| 2.3.10 | Updates from version 1.0.1 to 1.0.2 ..... | 5  |
| 2.3.11 | Updates from version 1.0.0 to 1.0.1 ..... | 5  |
| 2.4    | Applicable and Reference Documents.....   | 5  |
| 2.5    | Glossary.....                             | 6  |
| 3      | Software Overview.....                    | 7  |
| 3.1    | Ingestion Tool.....                       | 7  |
| 3.2    | Matchup Tool.....                         | 8  |
| 3.3    | Post Processing Tool .....                | 8  |
| 3.4    | Supported Satellite Sensors .....         | 9  |
| 3.4.1  | AMSR-E.....                               | 9  |
| 3.4.2  | AMSU-B .....                              | 10 |
| 3.4.3  | (A)ATSR.....                              | 11 |
| 3.4.4  | AVHRR .....                               | 12 |
| 3.4.5  | HIRS .....                                | 13 |
| 3.4.6  | MHS.....                                  | 13 |
| 3.4.7  | SSMT2 .....                               | 14 |
| 3.5    | Supported Insitu Data .....               | 16 |
| 3.5.1  | SST-CCI .....                             | 16 |
| 4      | Configuration .....                       | 17 |

# FIDUCEO Multi-sensor Match up System (MMS) V 1.2 Manual

---

|       |                                         |    |
|-------|-----------------------------------------|----|
| 4.1   | Configuration Files .....               | 17 |
| 4.1.1 | System Configuration .....              | 17 |
| 4.1.2 | Database Configuration .....            | 18 |
| 4.1.3 | MMD Writer Configuration.....           | 18 |
| 4.1.4 | UseCase Configuration.....              | 21 |
| 4.1.5 | Post Processing Configuration .....     | 30 |
| 5     | MMD file format .....                   | 40 |
| 6     | Installation and Operation on CEMS..... | 40 |
| 6.1   | Workspace Structure .....               | 40 |
| 6.2   | Building the MMS on CEMS .....          | 41 |
| 6.3   | Operating the MMS on CEMS.....          | 41 |
| 6.3.1 | Setting up the environment.....         | 41 |
| 6.3.2 | CEMS Specific Configuration .....       | 42 |
| 6.3.3 | Operating the MMS .....                 | 42 |
| 6.3.4 | Workflow Files .....                    | 43 |

# FIDUCEO Multi-sensor Match up System (MMS) **V 1.2** Manual

---

## 2 Introduction

This document is the user manual for the FiduCEO Multisensor Matchup System software (MMS). It covers all tools, configuration files, supported data formats and plugin configurations used by the software. In addition, a description of the installation and operation procedures on the CEDA JASMIN cluster is given.

### 2.1 Scope

This document is thought as a living document, updates will be integrated whenever applicable or necessary. The contents of this version of the manual refers to the MMS software version 1.2.0.

### 2.2 Version Control

| Version | Reason                                      | Reviewer | Date of Issue |
|---------|---------------------------------------------|----------|---------------|
| 1.0     | Initial version                             |          |               |
| 1.1     | New minor version                           |          |               |
| 1.2     | New minor version,<br>added post-processing |          | 2017-01-17    |

### 2.3 Software Changelog

This chapter lists the changes, updates and bugfixes applied to the MMS software.

#### 2.3.1 Updates from version 1.2.0 to 1.2.1

- Updated BorderDistance condition to allow distinguishing between reference and secondary sensor
- Added RFI glint variables to AMSR-E reader
- Added post processing plugin to add ERA-interim NWP data to matchup datasets

#### 2.3.2 Updates from version 1.1.3 to 1.2.0

- Implemented post processing engine
- Added spherical distance post-processing plugin
- Added AMSRE solar angles post-processing plugin
- Added SST in-situ time series extraction post-processing plugin
- Added WindowValue screening plugin

#### 2.3.3 Updates from version 1.1.2 to 1.1.3

- Added reader cache size parameter to MMD writer configuration
- Updated MMDWriter to store CF conforming default fill value attributes

#### 2.3.4 Updates from version 1.1.1 to 1.1.2

- Fixed bug in AVHRR reader that causes crashes when extracting 1x1 pixel windows

## 2.3.5 Updates from version 1.1.0 to 1.1.1

- Implemented full support for PostGIS databases

## 2.3.6 Updates from version 1.0.5 to 1.1.0

- Added condition plugin for overlap removal
- Added support for SST-CCI insitu data

## 2.3.7 Updates from version 1.0.4 to 1.0.5

- Migrated system configuration from properties to XML format
- Implemented configurable archiving rules

## 2.3.8 Updates from version 1.0.3 to 1.0.4

- Added MMD Writer configuration file
- Added MMD variable renaming engine

## 2.3.9 Updates from version 1.0.2 to 1.0.3

- Added reader for SSM/T-2 data
- Added full support for Apache H2 database
- Renamed parameter for AngularScreening plugin
- Added mmd writer configuration
- Fixed bug in HIRS reader plugin that prevented HIRS NOAA 18 data to be handled

## 2.3.10 Updates from version 1.0.1 to 1.0.2

- Added HIRS “Iza” angular screening
- Added HIRS L1C reader
- Updated regular expression for AMSU-B/MHS reader
- Added reader for ATSR1, ATSR2 and AATSR L1B data in ENVISAT format
- Added optional calculation of matchup center distance variable
- Added PixelValue screening plugin
- Corrected fill value handling to follow CF conventions
- Added reader form AMSR-E L2A data in HDF format
- Added support for multiple processing version of sensor data

## 2.3.11 Updates from version 1.0.0 to 1.0.1

- Implemented cloud screening algorithm for AMSU-B, MHS and SSMIS according to University of Hamburg
- Bugfixes:
  - Fixed issue where input files were not closed correctly
  - Fixed performance bottleneck when adding secondary observation pixels

## 2.4 Applicable and Reference Documents

The following documents are applicable (AD) or references (RD) in this manual

# FIDUCEO Multi-sensor Match up System (MMS) V 1.2 Manual

---

|      |                      |                                                                                                                                                                                                                                          |
|------|----------------------|------------------------------------------------------------------------------------------------------------------------------------------------------------------------------------------------------------------------------------------|
| RD 1 | FIDUCEO_MMS_IP_v_1_1 | Fiduceo Multisensor Matchup System Implementation Plan, version 1.1                                                                                                                                                                      |
| RD 2 | Buehler2007          | S. A. Buehler, M. Kuvatov, T. R. Sreerekha, V. O. John, B. Rydberg, P. Eriksson, and J. Notholt: A cloud filtering method for microwave upper tropospheric humidity measurements, <i>Atmos. Chem Phys. Discuss.</i> , 7, 7509–7534, 2007 |
| RD 3 | Hans2016             | TN: Computing the Tb thresholds for cloud detection for the different viewing angles, Imke Hans, University of Hamburg                                                                                                                   |
| RD 4 | SST_CCI-TN-UOL-003   | ESA CCI Phase 2 (SST) - MMD Content Specification                                                                                                                                                                                        |

## 2.5 Glossary

|        |                                                 |
|--------|-------------------------------------------------|
| CDO    | Climate Data Operators                          |
| CEDA   | Centre for Environmental Data Analysis          |
| CEMS   | Climate and Environmental Monitoring from Space |
| JDBC   | Java DataBase Connectivity                      |
| JDK    | Java Development Kit                            |
| LZA    | Local Zenith Angle                              |
| MMD    | Multisensor Matchup Dataset                     |
| MMS    | Multisensor Matchup System                      |
| NetCDF | Network Common Data Format                      |
| NWP    | Numerical Weather Prediction                    |
| TN     | Technical Note                                  |
| VZA    | Viewing Zenith Angle                            |
| XML    | eXtensible Markup Language                      |

## 3 Software Overview

The MMS is a software system that is composed of several interacting components. This chapter gives a high-level overview of the purpose and interactions of the components.

To operate the MMS tools, some external components need to be installed and accessible to the tools. This is mainly a unified archive of input data (see 4.1.1) and a database server engine (currently supported MongoDB, Apache H2 and PostGIS) with a user account accessible to the tools.

The calculation of matchup datasets is a three-step process:

1. Ingest satellite metadata into the database. This has to be run once for every input dataset that should be used for matchup analysis. This task is executed by the IngestionTool (chapter 3.1)
2. Find matchups and generate MMD files. This is done by the MatchupTool (chapter 3.2).
3. (optionally) Run a post-processing job on the generated MMDs. This is done by the PostProcessingTool (chapter 3.3).

### 3.1 Ingestion Tool

This tool extracts satellite metadata from the input files, pre-processes the metadata and stores the records to the database. The tool is invoked from the command line using the script *ingestion-tool.sh/bat* which is located in the *bin* directory of the MMS installation. The command line parameters can be plotted using the `-h/--help` option:

```
ingestion-tool version 1.1.1
usage: ingestion-tool <options>
Valid options are:
  -c,--config <arg>           Defines the configuration directory. Defaults to './config'.
  -end,--end-time <Date>      Define the ending time of products to inject.
  -h,--help                    Prints the tool usage.
  -s,--sensor <arg>          Defines the sensor to be ingested.
  -start,--start-time <Date>  Define the starting time of products to inject.
  -v,--version <arg>         Define the sensor data processing version.
```

**--config:** define the path to the configuration files directory

**--sensor:** define the sensor key to be ingested. Sensor keys are defined by the product reader modules available, see chapter 3.4.

**--version:** defines the sensor data processing version to be ingested. Must match one of the versions stored in the archive, see 4.1.1.

**--start-date:** defines the start date for the ingestion

**--end-date:** defines the end date for the ingestion

All satellite data file matching type and version with an acquisition time start that falls into the interval defined by *start-date* and *end-date* will be processed.

The ingestion tool uses the following configuration files:

- system-config.xml (chapter 4.1.1)
- database.properties (chapter 4.1.2)

### 3.2 Matchup Tool

The matchup tool calculates matchups and generates MMD files. The tool is invoked from the command line using the script *matchup-tool.sh/bat* which is located in the *bin* directory of the MMS installation. The command line parameters can be plotted using the `-h/--help` option:

```
matchup-tool version 1.1.1
usage: matchup-tool <options>
Valid options are:
  -c,--config <arg>           Defines the configuration directory. Defaults to './config'.
  -end,--end-time <arg>       Defines the processing end-date, format 'yyyy-DDD'
  -h,--help                    Prints the tool usage.
  -start,--start-time <arg>   Defines the processing start-date, format 'yyyy-DDD'
  -u,--usecase <arg>         Defines the path to the use-case configuration file. Path is
relative to the                configuration directory.
```

**--config:** define the path to the configuration files directory

**--start-time:** defines the start date for the ingestion

**--end-time:** defines the end date for the ingestion

**--usecase:** defines the usecase configuration file to use, see chapter 4.1.4

The matchup tool uses the following configuration files:

- system-config.xml (chapter 4.1.1)
- database.properties (chapter 4.1.2)
- mmd-writer-config.xml (chapter 4.1.3)

### 3.3 Post Processing Tool

The post processing tool allows to add/remove/modify variables in a set of MMD files already generated. It is a command line tool using the following parameters (the same printout can be achieved by running the tool using the `-h` parameter). The tool is started using shells scripts located in the *bin* directory of the installation named *post-processing-tool.sh/bat*.

```
post-processing-tool version 1.1.1
usage: post-processing-tool <options>
Valid options are:
  -c,--config <arg>           Defines the configuration directory. Defaults to './config'.
```



# FIDUCEO Multi-sensor Match up System (MMS) V 1.2

## Manual

```
-end,--end-date <arg>    Defines the processing end-date, format 'yyyy-DDD'.
                          DDD = day of year.
-h,--help                Prints the tool usage.
-i,--input-dir <arg>     Defines the path to the input mmd files directory.
-j,--job-config <arg>    Defines the path to post processing job configuration file.
                          Path is relative to the configuration directory.
-start,--start-date <arg> Defines the processing start-date, format 'yyyy-DDD'.
                          DDD = day of year.
```

**--config:** define the path to the configuration files directory

**--job-config:** define the job-configuration file to use; the format of this file is described in chapter 4.1.5.

**--input-dir:** defines the input data directory. All files inside this directory which match the file naming pattern "`mmd\{d{1,2}}.*.*.*_{d{4}}-{d{3}}_{d{4}}-{d{3}}.nc`" are collected as input files for post processing. The directory search runs recursively through all subdirectories.

**--start-date:** defines the start date for the post-processing

**--end-date:** defines the end date for the post processing

All MMD files with a start date within the period defined by start-date and end-date will be taken into account for processing. If any severe error occurs while computing a post processing, the processing will report the error and continue processing with the next input file, if possible.

The post processing tool uses the following configuration files:

- system-config.xml (chapter 4.1.1)
- post processing configuration (chapter 4.1.5)

### 3.4 Supported Satellite Sensors

This chapter lists the input satellite data source types available for matchup processing. In subsequent chapters, the sensors, the data format and the available variables are described in more detail.

#### 3.4.1 AMSR-E

AMSR-E L2A brightness temperatures in HDF4 format. This reader only handles the "Low\_Res\_Swath" data.

| Sensor Key | Source                         |
|------------|--------------------------------|
| amsre-aq   | AMSR-E data from Aqua platform |

| Variable Name   | Description                                             |
|-----------------|---------------------------------------------------------|
| Time            | Acquisition time per scanline in TAI seconds since 1993 |
| Latitude        | Latitude of pixel in decimal degrees                    |
| Longitude       | Longitude of pixel in decimal degrees                   |
| Earth_Incidence | Incidence angle of observation in degrees               |
| Earth_Azimuth   | Azimuth angle of observation in degrees                 |

# FIDUCEO Multi-sensor Match up System (MMS) V 1.2 Manual

|                                    |                                                                                                                        |
|------------------------------------|------------------------------------------------------------------------------------------------------------------------|
| Sun_Elevation                      | Sun elevation angle in degrees                                                                                         |
| Sun_Azimuth                        | Sun azimuth angle in degrees                                                                                           |
| Land_Ocean_Flag_6                  | Land coverage flag for 6 GHz channel                                                                                   |
| X_XV_Res_1_TB                      | Brightness temperatures vertical polarisation in low resolution for channels X_X (6_9, 10_7, 18_7, 23_8, 36_5, 89_0)   |
| X_XH_Res_1_TB                      | Brightness temperatures horizontal polarisation in low resolution for channels X_X (6_9, 10_7, 18_7, 23_8, 36_5, 89_0) |
| Scan_Quality_Flag                  | Quality flags per scan                                                                                                 |
| Channel_Quality_Flag_XXV           | Quality flags per vertical polarisation channel XX (6, 10, 18, 23, 36, 89)                                             |
| Channel_Quality_Flag_XXH           | Quality flags per horizontal polarisation channel XX (6, 10, 18, 23, 36, 89)                                           |
| Res1_Surf                          | Land coverage percentage for resolution one                                                                            |
| Geostationary_Reflection_Latitude  | RFI sources glint angles latitude                                                                                      |
| Geostationary_Reflection_Longitude | RFI sources glint angles longitude                                                                                     |

### 3.4.2 AMSU-B

AMSU-B L1c data from NOAA CLASS storage, converted to HDF using “atovin” and “convert\_to\_hdf5”.

| Sensor Key | Source        |
|------------|---------------|
| amsub-n15  | AMSU-B NOAA15 |
| amsub-n16  | AMSU-B NOAA16 |
| amsub-n17  | AMSU-B NOAA17 |

| Variable Name | Description                                                   |
|---------------|---------------------------------------------------------------|
| btemps_ch1    | Brightness temperature in channel 1 (2.9684 m <sup>-1</sup> ) |
| btemps_ch2    | Brightness temperature in channel 2 (5.0032 m <sup>-1</sup> ) |
| btemps_ch3    | Brightness temperature in channel 3 (6.1146 m <sup>-1</sup> ) |
| btemps_ch4    | Brightness temperature in channel 4 (6.1146 m <sup>-1</sup> ) |
| btemps_ch5    | Brightness temperature in channel 5 (6.1146 m <sup>-1</sup> ) |
| chanqual_ch1  | Channel quality for channel 1                                 |
| chanqual_ch2  | Channel quality for channel 2                                 |
| chanqual_ch3  | Channel quality for channel 3                                 |
| chanqual_ch4  | Channel quality for channel 4                                 |
| chanqual_ch5  | Channel quality for channel 5                                 |
| instrtemp     | Instrument temperature                                        |
| qualind       | Quality indicator                                             |
| scanqual      | Scan line quality                                             |
| scnlin        | Scan line number                                              |
| scnlindy      | Day of scan line acquisition                                  |
| scnlintime    | Time of scan line acquisition                                 |
| scnliny       | Year of scan line acquisition                                 |
| Latitude      | Latitude of pixel                                             |
| Longitude     | Longitude of pixel                                            |

# FIDUCEO Multi-sensor Match up System (MMS) V 1.2 Manual

|                         |                                   |
|-------------------------|-----------------------------------|
| Time                    | Acquisition time in TAI93 seconds |
| Satellite_azimuth_angle | The satellite azimuth angle       |
| Satellite_zenith_angle  | The satellite zenith angle        |
| Solar_azimuth_angle     | The solar azimuth angle           |
| Solar_zenith_angle      | The solar zenith angle            |

All per-scan line variables are extended to cover the full pixel grid.

### 3.4.3 (A)ATSR

ATSR1, ATSR2 and AATSR data in ENVISAT native format (\*.N1)

| Sensor Key | Source           |
|------------|------------------|
| atsr-e1    | ATSR1 on ERS1    |
| atsr-e2    | ATSR2 on ERS2    |
| aatsr-en   | AATSR on ENVISAT |

| Variable Name      | Description                                           |
|--------------------|-------------------------------------------------------|
| btemp_nadir_1200   | Brightness temperature, nadir view (11500-12500 nm)   |
| btemp_nadir_1100   | Brightness temperature, nadir view (10400-11300 nm)   |
| btemp_nadir_0370   | Brightness temperature, nadir view (3505-3895 nm)     |
| reflec_nadir_1600  | Reflectance, nadir view (1580-1640 nm)                |
| reflec_nadir_0870  | Reflectance, nadir view (855-875 nm)                  |
| reflec_nadir_0670  | Reflectance, nadir view (649-669 nm)                  |
| reflec_nadir_0550  | Reflectance, nadir view (545-565 nm)                  |
| confid_flags_nadir | Confidence flags, nadir view                          |
| cloud_flags_nadir  | Cloud flags, nadir view                               |
| btemp_fward_1200   | Brightness temperature, forward view (11500-12500 nm) |
| btemp_fward_1100   | Brightness temperature, forward view (10400-11300 nm) |
| btemp_fward_0370   | Brightness temperature, forward view (3505-3895 nm)   |
| reflec_fward_1600  | Reflectance, forward view (1580-1640 nm)              |
| reflec_fward_0870  | Reflectance, forward view (855-875 nm)                |
| reflec_fward_0670  | Reflectance, forward view (649-669 nm)                |
| reflec_fward_0550  | Reflectance, forward view (545-565 nm)                |
| confid_flags_fward | Confidence flags, forward view                        |
| cloud_flags_fward  | Cloud flags, forward view                             |
| lat_corr_nadir     | Latitude corrections, nadir view                      |
| lon_corr_nadir     | Longitude corrections, nadir view                     |
| sun_elev_nadir     | Solar elevation, nadir view                           |
| view_elev_nadir    | Satellite elevation, nadir view                       |
| sun_azimuth_nadir  | Solar azimuth, nadir view                             |
| view_azimuth_nadir | Satellite azimuth, nadir view                         |
| lat_corr_fward     | Latitude corrections, forward view                    |
| lon_corr_fward     | Longitude corrections, forward view                   |
| sun_elev_fward     | Solar elevation, forward view                         |

# FIDUCEO Multi-sensor Match up System (MMS) V 1.2 Manual

|                    |                                   |
|--------------------|-----------------------------------|
| view_elev_fward    | Satellite elevation, forward view |
| sun_azimuth_fward  | Solar azimuth, forward view       |
| view_azimuth_fward | Satellite azimuth, forward view   |
| latitude           | Latitudes                         |
| longitude          | Longitudes                        |
| altitude           | Topographic altitude              |

All tie-point raster variables are interpolated to the full raster resolution.

### 3.4.4 AVHRR

AVHRR L1C GAC data in NetCDF format, converted using routines developed at University of Reading.

| Sensor Key | Source          |
|------------|-----------------|
| avhrr-n06  | AVHRR NOAA06    |
| avhrr-n07  | AVHRR/2 NOAA07  |
| avhrr-n08  | AVHRR NOAA08    |
| avhrr-n09  | AVHRR/2 NOAA09  |
| avhrr-n10  | AVHRR NOAA10    |
| avhrr-n11  | AVHRR/2 NOAA11  |
| avhrr-n12  | AVHRR/2 NOAA12  |
| avhrr-n13  | AVHRR/2 NOAA13  |
| avhrr-n14  | AVHRR/2 NOAA14  |
| avhrr-n15  | AVHRR/3 NOAA15  |
| avhrr-n16  | AVHRR/3 NOAA16  |
| avhrr-n17  | AVHRR/3 NOAA17  |
| avhrr-n18  | AVHRR/3 NOAA18  |
| avhrr-n19  | AVHRR/3 NOAA19  |
| avhrr-m02  | AVHRR/3 METOP A |
| avhrr-m01  | AVHRR/3 METOP B |

| Variable Name     | Description                                     |
|-------------------|-------------------------------------------------|
| ch1               | Channel 1 reflectance                           |
| ch2               | Channel 2 reflectance                           |
| ch3               | Channel 3 reflectance (only AVHRR/2)            |
| ch3a              | Channel 3a reflectance (only AVHRR/2 AVHRR/3)   |
| ch3b              | Channel 3b brightness temperature               |
| ch4               | Channel 4 brightness temperature                |
| ch5               | Channel 5 brightness temperature (only AVHRR/3) |
| cloud_mask        | CLAVR-X cloud mask                              |
| cloud_probability | CLAVR-X cloud probability                       |
| dtime             | Scanline time difference from start time        |
| ict_temp          | Temperature of internal calibration target      |
| l1b_line_number   | Level 1b line number                            |
| lat               | Latitude coordinates                            |

# FIDUCEO Multi-sensor Match up System (MMS) V 1.2 Manual

|                        |                        |
|------------------------|------------------------|
| lon                    | Longitude coordinates  |
| qual_flags             | Quality Flags          |
| relative_azimuth_angle | Relative Azimuth Angle |
| satellite_zenith_angle | Satellite zenith angle |
| solar_zenith_angle     | Solar zenith angle     |

### 3.4.5 HIRS

HIRS L1C data converted to NetCDF using tools developed at University of Reading.

| Sensor Key     | Source                       |
|----------------|------------------------------|
| hirs-tn        | HIRS/2 on Tiros-N            |
| hirs-n06 – n12 | HIRS/2 on NOAA 6 to NOAA 12  |
| hirs-n14       | HIRS/2 on NOAA 14            |
| hirs-n15 – n17 | HIRS/3 on NOAA 15 to NOAA 17 |
| hirs-n18 – n19 | HIRS/4 on NOAA 18 to NOAA 19 |
| hirs-ma        | HIRS/4 on Metop-A            |
| hirs-mb        | HIRS/4 on Metop-B            |

| Variable Name        | Description                                         |
|----------------------|-----------------------------------------------------|
| time                 | Acquisition time per scanline in seconds since 1970 |
| lat                  | Latitude of pixel                                   |
| lon                  | Longitude of pixel                                  |
| bt_ch01 – ch19       | Brightness temperatures for channel 1 to 19         |
| radiance_ch01 – ch19 | TOA radiances for channel 1 to 19                   |
| counts_ch01 – ch19   | Raw measurement counts for channels 1 to 19         |
| lza                  | Local zenith angle                                  |
| scanline             | Original scanline number                            |
| scanpos              | Original scan position number                       |
| scanline_type        | Scanline type flag                                  |

### 3.4.6 MHS

MHS L1c data from NOAA CLASS storage, converted to HDF using “atovin” and “convert\_to\_hdf5”.

| Sensor Key | Source        |
|------------|---------------|
| mhs-n18    | MHS on NOAA18 |
| mhs-n19    | MHS on NOAA19 |
| mhs-ma     | MHS on MetopA |
| mhs-mb     | MHS on MetopB |

| Variable Name      | Description                                |
|--------------------|--------------------------------------------|
| btemps_ch1 ... ch5 | Brightness temperatures for channel 1 to 5 |

# FIDUCEO Multi-sensor Match up System (MMS) V 1.2 Manual

|                         |                                      |
|-------------------------|--------------------------------------|
| chanqual_ch1 ... ch5    | Channel quality flags                |
| instrtemp               | Instrument temperature in Kelvin     |
| qualind                 | Quality indicator                    |
| scanqual                | Scan line quality                    |
| scnlin                  | Scan line number                     |
| scnlindy                | Scan line acquisition day of year    |
| scnlintim               | Scan line acquisition seconds of day |
| scnliny                 | Scan line acquisition year           |
| Latitude                | Pixel latitude in degrees            |
| Longitude               | Pixel longitude in degrees           |
| Satellite_azimuth_angle | Satellite azimuth angle              |
| Satellite_zenith_angle  | Satellite zenith angle               |
| Solar_azimuth_angle     | Sun azimuth angle                    |
| Solar_zenith_angle      | Sun zenith angle                     |

All per-scan line variables are extended to cover the full pixel grid.

### 3.4.7 SSMT2

SSMT2 L1C data in NetCDF format.

| Sensor Key | Source             |
|------------|--------------------|
| ssmt2-f11  | SSMT/2 on DMSP F11 |
| ssmt2-f12  | SSMT/2 on DMSP F12 |
| ssmt2-f14  | SSMT/2 on DMSP F14 |
| ssmt2-f15  | SSMT/2 on DMSP F15 |

| Variable Name                    | Description                                  |
|----------------------------------|----------------------------------------------|
| ancil_data_Year_1                | Scan information – year                      |
| ancil_data_DayofYear_1           | Scan information – day of year               |
| ancil_data_SecondsofDay_1        | Scan information – seconds of day            |
| ancil_data_SatLat                | Satellite nadir latitude                     |
| ancil_data_SatLong               | Satellite nadir longitude                    |
| ancil_data_SatAlt                | Satellite altitude                           |
| ancil_data_SatHeading            | Satellite heading                            |
| ancil_data_Year_2                | Scan information – year                      |
| ancil_data_DayofYear_2           | Scan information – day of year               |
| ancil_data_SecondsofDay_2        | Scan information – seconds of day            |
| tb_ch1 ... tb_ch5                | Brightness temperatures in channels 1 to 5   |
| lon                              | Pixel longitude                              |
| lat                              | Pixel latitude                               |
| channel_quality_flag_ch1 ... ch5 | Channel quality flags for channels 1 to 5    |
| gain_control_ch1 ... ch5         | Gain control for channels 1 to 5             |
| counts_to_tb_gain_ch1 ... ch5    | Conversion scale factors for channel 1 to 5  |
| counts_to_tb_offset_ch1 ... ch5  | Conversion offset values for channels 1 to 5 |

# FIDUCEO Multi-sensor Match up System (MMS) V 1.2 Manual

---

|                                                        |                                                                                                                          |
|--------------------------------------------------------|--------------------------------------------------------------------------------------------------------------------------|
| Temperature_misc_housekeeping_thermistorcount01 ... 18 | Thermistor status information for thermistors 1 to 18                                                                    |
| warm_counts_ch1_cal1 ... ch5_cal4                      | Warm calibration counts for channels 1 to 5 and views 1 to 4                                                             |
| cold_counts_ch1_cal1 ... ch5_cal4                      | Cold calibration counts for channels 1 to 5 and views 1 to 4                                                             |
| Satellite_zenith_angle                                 | Artificial variable containing the satellite zenith angle derived from the scan position and the platform orbit altitude |

## 3.5 Supported Insitu Data

This chapter lists the input in-situ data source types available for matchup processing. In subsequent chapters, the sensors, the data format and the available variables are described in more detail.

### 3.5.1 SST-CCI

In-situ data collected for SST-CCI, sea surface temperature. Formatted to NetCDF following the project specifications (RD 4)

| Sensor Key     | Source                                     |
|----------------|--------------------------------------------|
| drifter-sst    | Drifter based SST data                     |
| ship-sst       | Ship based SST data                        |
| gtmba-sst      | Global Tropical Moored Buoy Array SST data |
| radiometer-sst | Radiometer based SST data                  |
| argo-sst       | Argo floater based SST data                |
| xbt-sst        | Expendable Bathythermograph SST data       |
| mbt-sst        | MBT SST data                               |
| ctd-sst        | CTD SST data                               |
| animal-sst     | Animal based SST measurements              |
| bottle-sst     | Bottle SST data                            |

| Variable Name                  | Description                                                  |
|--------------------------------|--------------------------------------------------------------|
| insitu.time                    | Acquisition time in seconds since 1978-01-01                 |
| insitu.lat                     | Latitude of measurement position                             |
| insitu.lon                     | Longitude of measurement position                            |
| insitu.sea_surface_temperature | SST in degrees Celsius                                       |
| insitu.sst_uncertainty         | Measurement uncertainty in degrees Celsius                   |
| insitu.sst_depth               | Measurement depth in meters                                  |
| insitu.sst_qc_flag             | In situ sea surface temperature MOHC QC flag                 |
| insitu.sst_track_flag          | In situ sea surface temperature MOHC track flag              |
| insitu.mohc_id                 | Unique ID from MOHC database                                 |
| insitu.id                      | Unique ID generated from acquisition year, month and mohc_id |



## 4 Configuration

The Fiduceo MMS is a highly configurable software system that allows customisation wherever applicable.

### 4.1 Configuration Files

This chapter lists the available parameters in various configuration files that are used by the software. All configuration files should be located in a single configuration directory.

#### 4.1.1 System Configuration

The system configuration file “system-config.xml” contains global settings that affect all components of the MMS. An example XML configuration is displayed below; each tag is explained later in the document.

```
<system-config>
  <geometry-library name="S2"/>

  <archive>
    <root-path>
      /usr/local/data/fiduceo
    </root-path>

    <rule sensors="drifter-sst, ship-sst, gtmba-sst, ...">
      insitu/SENSOR/VERSION"
    </rule>
  </archive>
</system-config>
```

**geometry-library:** defines the geometry library to be used for geometric operations. Available values are

- “S2” – use the Google S2 spherical library – the default and recommended value
- “JTS” – use the Java Topology Suite library – experimental

**archive:** defines all settings related to the satellite data archive.

**root-path:** defines the root directory containing the input datasets used for matchup processing by default, the archive is organised as

```
<root>/<sensor-platform>/<version>/<year>/<month>/(<day>)
```

**rule:** this tag allows to define specific archiving rules that may differ from the default organisation. Any number of rules may be added to the configuration. A rule can apply to one or many sensors, defined by the “sensors” attribute of the rule tag. Multiple sensors are written as comma-separated list of sensor types. All types defined in 3.4 are valid entries for this tag.

A rule defines a general path into the archive. The elements of the path have to be separated by a forward slash “/”. Path elements can be either selected from a list of pre-defined entities or defined as custom

elements. The pre-defined entities will be expanded dynamically during runtime; the custom elements are treated as constant path elements. Pre-defined path elements are:

- SENSOR – will be expanded to the sensor name being processed
- VERSION – will be expanded to the data version being processed
- YEAR – will be expanded to the currently processed year
- MONTH - will be expanded to the currently processed month
- DAY - will be expanded to the currently processed day

### 4.1.2 Database Configuration

The database configuration file “database.properties” defines the connection properties for the MMS database. It is a java properties file containing unstructured key/value pairs.

The following settings are available:

**driverClassName:** defines the database connection driver class name. The following values are available:

- “mongodb”: use the MongoDB database driver class – the default and recommended value
- “org.postgres.Driver”: use the PostGIS JDBC database driver
- “org.h2.driver”: use the H2 in memory database driver
- “com.mysql.jdbc.driver”: use the MySQL JDBC database driver - experimental

**url:** defines the database connection URL. The format depends on the driverClassName selected, please consult the documentation of the specific database vendor for details.

**username:** defines the database user name that is submitted during the database connection process.

**password:** defines the password that is submitted during the database connection process.

### 4.1.3 MMD Writer Configuration

The MMD output format and content can be configured using this file. In addition, it allows fine-tuning of the writer performance and behaviour. The configuration file is an XML file named “mmd-writer-config.xml” and located in the standard configuration directory.

An example configuration is displayed below; each tag is explained later in the document.

```
<?xml version="1.0" encoding="UTF-8"?>
<mmd-writer-config>
  <overwrite>>false</overwrite>
  <cache-size>2048</cache-size>
  <reader-cache-size>8</reader-cache-size>
  <netcdf-format>N4</netcdf-format>
  <variables-configuration>
    ...
```

```
</variables-configuration>  
</mmd-writer-config>
```

**overwrite:** this tag defines the MMD writer behaviour when encountering an already existing file in the target directory.

- false: software raises an exception and stops
- true: software deletes the existing file and writes the new one.

**cache-size:** defines the cache size in number of matchups that is used by the mmd-writer. Default value is 2048. Reduce this number when experiencing OutOfMemory errors on large subset window sizes.

**reader-cache-size:** defines the reader cache size in number of open file readers. The reader cache keeps frequently used input files open to increase the MMD writing performance. This setting defines the number of input files that are kept simultaneously open.

**netcdf-format:** defines the NetCDF file format version used for the MMD files. Available values are:

- “N3” - write MMDs in NetCDF version 3 format
- “N4” - write MMDs in NetCDF version 4 format – the default value

**variables-configuration:** allows to rename or exclude variables or attributes. A detailed description is given in the following chapter.

### 4.1.3.1 Variables Configuration

The variables configuration section of the MMD writer configuration allows fine-tuning the content of the final matchup data files. It is possible to

- rename a sensor
- define a separator per sensor namespace for name concatenation
- exclude variables
- rename variables
- rename attributes of variables

For a detailed description of the content and structure of an MMD file and the naming convention used, please refer to chapter 5.

#### 4.1.3.1.1 Renaming a sensor

In the standard configuration the sensors reference are named as they appear in the descriptions in chapters 3.4 and 3.5. This behaviour can be changed using the sensor-rename tag. Multiple sensor-rename tags are allowed inside a variables configuration.

Example:

```
<mmd-writer-config>
  <variables-configuration>
    <sensor-rename source-name="amsub-n16" target-name="AMSU-B_NOAA16" />
  </variables-configuration>
</mmd-writer-config>
```

#### 4.1.3.1.2 Define a separator per sensor namespace

The MMS stores input variables to the MMD using the pattern <sensor-name><separator><variable-name>, for example "ssmt2-f14\_tb-ch4". This configuration aspect allows to change the separator character, which is set to the underscore character '\_' by default. Separators can be associated to one or many sensors, which have to be added as a comma-separated list.

Example:

```
<mmd-writer-config>
  <variables-configuration>
    <separator sensor-names="sen1, sen2, ..." separator = "." />
  </variables-configuration>
</mmd-writer-config>
```

#### 4.1.3.1.3 Exclude variables

It is possible to exclude variables of the input data from being written to the MMD file. The exclude tag allows to exclude any number of variables from a given sensors variables list. The names appearing in the exclude tag must exactly match the variable names of the input products as listed in chapters 3.4 and 3.5.

Example:

```
<mmd-writer-config>
  <variables-configuration>
    <sensors names="hirs-n17, hirs-n16">
      <exclude source-name="not_needed" />
      <exclude source-name="useless" />
    </sensors>
  </variables-configuration>
</mmd-writer-config>
```

#### 4.1.3.1.4 Rename variables

Using this tag, it is possible to rename variables, i.e. to define a different name for the variable in the MMD as it originally appeared in the input data. This tag only changes the variable name, the sensor and separator parts of the final composite name are not affected, these can be changed separately. The names of the source variables appearing in the rename tag must exactly match the variable names of the input product as listed in chapters 3.4 and 3.5.

Example:

```
<mmd-writer-config>
```

```
<variables-configuration>
  <sensors names="hirs-n17, hirs-n16">
    <rename source-name="stupid" target-name="cool" />
    <rename source-name="boring" target-name="exciting" />
  </sensors>
</variables-configuration>
</mmd-writer-config>
```

#### 4.1.3.1.5 Rename attributes of variables

It is possible to adapt the names of attributes of any variable in the MMD. The names of the source variables and attribute names appearing in the rename-attribute tag must exactly match the variable and attribute names of the input product as listed in chapters 3.4 and 3.5.

```
<mmd-writer-config>
<variables-configuration>
  <sensors names="hirs-n17, hirs-n16">
    <rename-attribute source-name="attN1" target-name="attN1_r" />
    <rename-attribute variable-names="var1" source-name="attN2" target-name="attN2_r" />
    <rename-attribute variable-names="var1, var2" source-name="attN3" target-name="attN3_r" />
  </sensors>
</variables-configuration>
</mmd-writer-config>
```

#### 4.1.4 UseCase Configuration

This configuration file defines the parameter-set to be used for a matchup processing. It is an XML file that has to be located in the configuration directory used for processing.

An example configuration is displayed below; each tag is explained later in the document.

```
<?xml version="1.0" encoding="UTF-8"?>
<use-case-config name="mmd02">
  <sensors>
    <sensor>
      <name>avhrr-n17</name>
      <primary>>false</primary>
    </sensor>
    <sensor>
      <name>avhrr-n18</name>
      <primary>>true</primary>
    </sensor>
  </sensors>

  <dimensions>
    <dimension name="avhrr-n17">
      <nx>5</nx>
      <ny>5</ny>
    </dimension>
```

```
<dimension name="avhrr-n18">
  <nx>5</nx>
  <ny>5</ny>
</dimension>
</dimensions>

<write-distance>true</write-distance>
<output-path>/tmp/fiduceo_test/usecase-02</output-path>

<conditions>
  <time-delta>
    <time-delta-seconds>10800</time-delta-seconds>
  </time-delta>
  <spherical-distance>
    <max-pixel-distance-km>3.0</max-pixel-distance-km>
  </spherical-distance>
</conditions>

<screenings>
  <angular>
    <primaryVZAVariable name="satellite_zenith_angle" />
    <secondaryVZAVariable name="satellite_zenith_angle" />
    <maxAngleDelta>10.0</maxAngleDelta>
  </angular>
</screenings>

  <num-random-seed-points>20000</num-random-seed-points>
</use-case-config>
```

Each usecase configuration file starts with an XML version and character encoding statement. The enclosing `<use-case-config name="mmd02">` tag defines the content of the configuration. Each usecase configuration has to be given a name that is set in the “name” attribute as shown above. This name is used during MMD file generation to create the result file names.

**sensors:** this tag encloses a list of sensors to be processed. Each sensor element in this list must contain a valid `<name>` tag that defines the sensor name. The sensor names must match one name of the list of supported sensors, see chapters 3.4 and 3.5. One of the sensors must be tagged as being the primary (i.e. reference) sensor in this list of sensors. This is accomplished by adding a primary tag with the value “true”:

```
<primary>true</primary>
```

The primary tag with a value of “false” can be omitted, the software automatically assumes this when the tag is missing.

Optionally, a sensor data can be restricted to a single data/processing version. This can be expressed by adding a version tag:

```
<data-version>v2.08</data-version>
```

When the version tag is omitted, the MMS uses all available data versions for this sensor for processing.

**dimensions:** enclosed by this tag is a list of dimension tags. These define the output window size for each matchup, i.e. the size of the data extract stored to the MMD with the matchup x/y location in the centre. It is required that for each sensor defined in the sensor list, an associated dimension is being defined. The association is realised by matching the names, stored as dimension attribute “name”.

The tags “nx” and “ny” define the extent of each dimension, they define the complete width and height of the extract. Following the requirement of a central matchup pixel, both values have to be odd numbers.

**write-distance:** specifies whether the MMD file shall contain an additional variable that stores the matchup centre distance in kilometres. Valid values are “true” and “false”, defaults to “false”.

**output-path:** defines the target directory for the processing. All MMD files generated will be stored in the directory denoted in this tag.

**conditions:** this tag encloses a list of condition plugin configurations. The values in each configuration are depending on the plugin and are explained in more detail in chapter 4.1.4.1.

**screenings:** this tag encloses a list of screening plugin configurations. The values in each configuration are depending on the plugin and are explained in more detail in chapter 4.1.4.2.

**num-random-seed-points:** specifies the number of global generated pseudo random seed points (sobol generated points). The points are nearly equidistant distributed on the globe and also nearly equidistant distributed in the time range defined by the matchup tool command line arguments. (See 3.2 Matchup Tool)

If number of random seed points is bigger than 0 the “Seed Point Matchup Strategy” is used to find matchup pixels between primary and secondary sensors.

The “Seed Point Matchup Strategy” is helpful to avoid that all the pixels of the entire observations are matchups, e.g. if the primary and secondary observation geometries are congruent, because they are on the same platform.

#### 4.1.4.1 Conditions

This chapter lists the configuration settings for all condition plugins available for the MatchupTool. A condition plugin serves for checking that a matchup conforms to the condition defined. A condition plugin operates solely on the raw matchup information, i.e.

- Primary and secondary pixel
  - Geo-location longitude and latitude
  - Pixel raster location x and y
  - Pixel acquisition time in seconds since epoch
- Primary and secondary product raster width and height
- Primary and secondary extraction window sizes

- The processing time-range

When one or more of the subsequent plugin configurations are present in the configuration, the corresponding plugin is loaded and configured using the values supplied. During processing, the chain of plugins is applied to the matchups. The order of the condition configurations defines the processing order.

#### 4.1.4.1.1 Border Distance Condition

This condition ensures that the matchup location within the data file raster is within a defined distance from the raster borders. The condition can check primary and secondary acquisition positions using different parameters, according to the configuration. If the pixel is outside the defined boundaries, the matchup is rejected. Example:

```
<border-distance>
  <primary>
    <nx>22</nx>
    <ny>6</ny>
  </primary>

  <secondary>
    <nx>5</nx>
    <ny>8</ny>
  </secondary>
</border-distance>
```

“primary”: if tag is present, the primary (i.e. reference) sensor position is checked

“secondary”: if tag is present, the secondary sensor position is checked

“nx” defines the minimal distance of the matchup centre location x coordinate to the left or right data raster boundary.

“ny” defines the minimal distance of the matchup centre location y coordinate to the upper or lower data raster boundary.

#### 4.1.4.1.2 Spherical Distance Condition

This condition ensures that the primary and secondary matchup location are within a given spherical distance. If the matchup pixel centre locations (in lon/lat) are further apart than the threshold value, the matchup is rejected. Example:

```
<spherical-distance>
  <max-pixel-distance-km>6</max-pixel-distance-km>
</spherical-distance>
```



### 4.1.4.1.3 Time Delta Condition

This condition verifies that the pixel acquisition time difference of the contributing primary and secondary products do not exhibit the configured threshold. All pixels with an acquisition time difference above the threshold are rejected. Example:

```
<time-delta>
  <time-delta-seconds>10800</time-delta-seconds>
</time-delta>
```

### 4.1.4.1.4 Overlap Remove Condition

This condition plugin removes overlapping extraction windows. The plugin can operate either on the primary or on the secondary sensor extracts. It checks all matchup pixels for overlapping extraction windows and rejects all appropriate, so that the remaining list of matchups does not have overlapping areas. Example:

```
<overlap-remove>
  <reference>PRIMARY</reference>
</overlap-remove>
```

“reference”: denotes the sensor that shall be used for overlap removal. Valid choices are “PRIMARY” and “SECONDARY”.

### 4.1.4.2 Screenings

This chapter lists the configuration settings for all screening plugins available for the MatchupTool. A screening plugin serves for checking that a matchup conforms to the condition defined. A screening plugin operates on the raw matchup information (see chapter 4.1.4.1) and additionally has access to the product data readers.

When one or more of the subsequent plugin configurations are present in the configuration, the corresponding plugin is loaded and configured using the values supplied. During processing, the chain of plugins is applied to the matchups. The order of the screening configurations defines the processing order.

#### 4.1.4.2.1 Angular Screening

This plugin performs a number of screenings on the satellite or viewing zenith or azimuth angles. The names of the variables can be configured, as well as the screenings that shall be applied and the associated thresholds. A screening is executed only when the associated tag is present in the configuration. Example:

```
<angular>
  <primary-vza-variable name="zenith_angle"/>
  <secondary-vza-variable name="satellite_zenith_angle"/>
  <max-primary-vza>10.0</max-primary-vza>
  <max-secondary-vza>15.0</max-secondary-vza>
```

```
<max-angle-delta>17.0</max-angle-delta>
</angular>
```

“primary-vza-variable” denotes the variable name containing the angle to be screened for the primary sensor.

“secondary-vza-variable” denotes the variable name containing the angle to be screened for the secondary sensor.

“max-primary-vza” denotes the threshold for the primary angular variable in decimal degrees. All matchups with a value higher than the threshold value are rejected. Requires “primary-vza-variable” to be set. If tag is not present, the screening is not applied.

“max-secondary-vza” denotes the threshold for the secondary angular variable in decimal degrees. All matchups with a value higher than the threshold value are rejected. Requires “secondary-vza-variable” to be set. If tag is not present, the screening is not applied.

“max-angle-delta” denotes the maximal angular difference absolute value in decimal degrees. Matchups with an angular difference higher than the threshold are rejected. Requires “primary-vza-variable” and “secondary-vza-variable” to be set. If tag is not present, the screening is not applied.

#### 4.1.4.2.2 Angular Cosine Proportion Screening

This plugin performs a screening on satellite viewing zenith angles as defined by the University of Hamburg (see RD 1), following the equation:

$$\left| \frac{\cos(\text{primaryVZA})}{\cos(\text{secondaryVZA})} - 1 \right| < \varepsilon_1$$

All matchups with a proportion value exceeding the threshold are rejected. Example configuration:

```
<angular-cosine-proportion>
  <primary-variable name="zenith_angle"/>
  <secondary-variable name="satellite_zenith_angle"/>
  <threshold>0.02</threshold>
</angular-cosine-proportion>
```

“primary-variable” denotes the variable name containing the angle to be screened for the primary sensor.

“secondary-variable” denotes the variable name containing the angle to be screened for the primary sensor.

“threshold” denotes the threshold value (i.e. the  $\varepsilon_1$  in the equation above).

### 4.1.4.2.3 HIRS LZA Angular Screening

The LZA variable in the HIRS L1C data describes the local zenith angle for each scanline x-position. It does not distinguish left and right nadir positions. To implement a correct angular difference screening, the scanposition dataset has to be taken into account.

This plugin implements a correct angular difference screening for HIRS data following the algorithm:

$$\sigma_{\text{primary}} = \text{scanpos}_{\text{primary}} < 28 ? -1.0 : 1.0$$

$$\sigma_{\text{secondary}} = \text{scanpos}_{\text{secondary}} < 28 ? -1.0 : 1.0$$

$$\text{angDelta} = \text{abs}(\sigma_{\text{primary}} * \text{lza}_{\text{primary}} - \sigma_{\text{secondary}} * \text{lza}_{\text{secondary}})$$

All matchups with an angDelta above the “max-lza-delta” threshold are rejected. Values are in decimal degrees. Example configuration:

```
<hirs-lza-delta>
  <max-lza-delta>10.0</max-lza-delta>
</hirs-lza-delta>
```

### 4.1.4.2.4 Buehler Cloud Screening

This plugin performs a cloud screening for microwave sensors based on the algorithm described in RD 2 and RD 3. It is applicable to AMSU-B, MHS and SSM/T-2. It can be applied either to primary, secondary or both sensor data. The screening is only executed when all three configuration values for the sensors are set. To switch the screening for a sensor off, remove the associated tags from the configuration. All matchups detected as cloudy are rejected.

Example configuration:

```
<buehler-cloud>
  <primary-narrow-channel name="btemp_ch18"/>
  <primary-wide-channel name="btemp_ch20"/>
  <primary-vza name="Satellite_zenith_angle"/>

  <secondary-narrow-channel name="btemp_ch3"/>
  <secondary-wide-channel name="btemp_ch4"/>
  <secondary-vza name="Satellite_zenith_angle"/>
</buehler-cloud>
```

“primary-narrow-channel” denotes the variable name containing the narrow bandwidth channel for the primary sensor.

“primary-wide-channel” denotes the variable name containing the wide bandwidth channel for the primary sensor.

“primary-vza” denotes the variable name containing the satellite zenith angle values for the primary sensor.

# FIDUCEO Multi-sensor Match up System (MMS) V 1.2 Manual

---

“secondary-narrow-channel” denotes the variable name containing the narrow bandwidth channel for the secondary sensor.

“secondary-wide-channel” denotes the variable name containing the wide bandwidth channel for the secondary sensor.

“secondary-vza” denotes the variable name containing the satellite zenith angle values for the secondary sensor.

#### 4.1.4.2.5 Pixel Value Screening

This screening plugin allows selecting matchups using a mathematical expression consisting of any combination of input variables. The plugin allows entering different expressions for primary and secondary sensor. Mathematical expressions can be arbitrarily complex but must evaluate to a Boolean value. The mathematical expressions are evaluated using the matchup location only. All matchups where either the primary or the secondary expression evaluate to false are rejected.

Mathematical expressions can be composed of variables and functions.

Variables available are all variables contained in the input satellite or in-situ data using the name as it appears in the file and as documented in section chapters 3.4 and 3.5, e.g. “btemps\_ch5” for AMSU-B brightness temperature in channel 5. In addition to this, the constants “PI” and “E” are available denoting pi and e. And of course any number typed into the expression is treated as numerical constant.

Mathematical operations and functions available are:

| Function | Description                                                                                                                                                                                                                                                                                                                      |
|----------|----------------------------------------------------------------------------------------------------------------------------------------------------------------------------------------------------------------------------------------------------------------------------------------------------------------------------------|
| +        | Addition                                                                                                                                                                                                                                                                                                                         |
| -        | Subtraction                                                                                                                                                                                                                                                                                                                      |
| *        | Multiplication                                                                                                                                                                                                                                                                                                                   |
| /        | Division                                                                                                                                                                                                                                                                                                                         |
| ==       | Equality comparison                                                                                                                                                                                                                                                                                                              |
| !=       | Inequality comparison                                                                                                                                                                                                                                                                                                            |
| >        | Greater than                                                                                                                                                                                                                                                                                                                     |
| >=       | Greater than or equal                                                                                                                                                                                                                                                                                                            |
| <        | Less than                                                                                                                                                                                                                                                                                                                        |
| <=       | Less than or equal                                                                                                                                                                                                                                                                                                               |
| abs      | Calculates absolute value of argument                                                                                                                                                                                                                                                                                            |
| acos     | Arc cosine of argument                                                                                                                                                                                                                                                                                                           |
| ampl     | Calculates amplitude of arguments ( $a^2 + b^2$ )                                                                                                                                                                                                                                                                                |
| asin     | Arc sine of argument                                                                                                                                                                                                                                                                                                             |
| atan     | Arc tangent of argument                                                                                                                                                                                                                                                                                                          |
| atan2    | The theta component of the point (r, theta) in polar coordinates that corresponds to the point (x, y) in Cartesian coordinates.<br>( <a href="https://docs.oracle.com/javase/7/docs/api/java/lang/Math.html#atan2(double,%20double)">https://docs.oracle.com/javase/7/docs/api/java/lang/Math.html#atan2(double,%20double)</a> ) |
| avg      | Mean value of arguments                                                                                                                                                                                                                                                                                                          |

# FIDUCEO Multi-sensor Match up System (MMS) V 1.2

## Manual

|                 |                                                                                                                                                  |
|-----------------|--------------------------------------------------------------------------------------------------------------------------------------------------|
| bit_set         | Checks whether a bit is set or not, first argument is the value to check, second argument is the bit index (e.g. bit_set(cloud_flags_fward , 1)) |
| ceil            | Round upwards to next integer value                                                                                                              |
| cos             | Cosine of argument                                                                                                                               |
| cosech          | Hyperbolic cosecant of argument                                                                                                                  |
| cosh            | Hyperbolic cosine of argument                                                                                                                    |
| deg             | Converts argument from radians to decimal degrees                                                                                                |
| distance        | Calculates the distance (sqrt of sum of squares)                                                                                                 |
| exp             | Exponential of argument                                                                                                                          |
| exp10           | Ten to the power of argument                                                                                                                     |
| feq             | Fuzzy equality (1e-6 accuracy) or when used with three arguments, third argument supplies maximal delta.                                         |
| floor           | Round downwards to next integer value                                                                                                            |
| fneq            | Fuzzy inequality (1e-6 accuracy) or when used with three arguments, third argument supplies maximal delta.                                       |
| inf             | Check argument for infinity. Returns 1 if argument is positive or negative infinite, returns 0 otherwise                                         |
| log             | Natural logarithm of argument                                                                                                                    |
| log10           | Logarithm to the base of 10 of argument                                                                                                          |
| max             | Maximum value of arguments                                                                                                                       |
| min             | Minimum value of arguments                                                                                                                       |
| nan             | Checks argument for "not a number". Returns 1 if argument is not a number, 0 otherwise                                                           |
| phase           | Calculates phase of arguments (atan2(b,a))                                                                                                       |
| pow             | General power function $a^b$                                                                                                                     |
| rad             | Converts argument in decimal degrees to radians                                                                                                  |
| random_gaussian | Generates a random number from a gaussian distributed process                                                                                    |
| random_uniform  | Generates a random number from a uniformly distributed process                                                                                   |
| round           | Round to closes integer value                                                                                                                    |
| sech            | Hyperbolic secant of argument                                                                                                                    |
| sign            | Compute signum, returns +1 for positive, -1 for negative and 0 for zero argument                                                                 |
| sin             | Sine of argument                                                                                                                                 |
| sinh            | Hyperbolic sine of argument                                                                                                                      |
| sq              | Square of argument                                                                                                                               |
| sqrt            | Square root of argument                                                                                                                          |
| tan             | Tangent of argument                                                                                                                              |
| tanh            | Hyperbolic tangent of argument                                                                                                                   |

All matchups where the mathematical expression for either primary or secondary sensor evaluates to false are rejected. Example configuration:

```
<pixel-value>
  <primary-expression>btemp_ch4 >= 180.5</primary-expression>
  <secondary-expression>cloud_probability < 0.25</secondary-expression>
</pixel-value>
```

### 4.1.4.2.6 Window Value Screening

This screening plugin allows selecting matchups using a mathematical expression consisting of any combination of input variables. The plugin allows entering different expressions for primary and secondary sensor. Mathematical expressions can be arbitrarily complex but must evaluate to a Boolean value. The mathematical expressions are evaluated for each pixel of a window defined by the matchup location and an interval defined by the use case configuration.

Additional to the mathematical expression two more properties must be defined. The percentage and the evaluate property. The evaluate property decide whether pixels with fill value should be ignored or all pixels of the window are used to calculate the percentage pixel count.

All matchups where either the primary or the secondary percentage evaluate to less pixels are valid are rejected.

Mathematical expressions can be composed of variables and functions.

Variables available are all variables contained in the input satellite or in-situ data using the name as it appears in the file and as documented in section chapters 3.4 and 3.5, e.g. "btemps\_ch5" for AMSU-B brightness temperature in channel 5. In addition to this, the constants "PI" and "E" are available denoting pi and e. And of course any number typed into the expression is treated as numerical constant.

Mathematical operations and functions available are the same as in 4.1.4.2.5.

Example configuration:

```
<window-value>
  <primary>
    <expression>btemp_ch4 >= 180.5</expression>
    <percentage>22.3</percentage>
    <evaluate>EntireWindow</evaluate> // second option is "IgnoreNoData"
  </primary>
  <secondary>
    <expression> cloud_probability < 0.25</expression>
    <percentage>50.0</percentage>
    <evaluate>IgnoreNoData</evaluate>
  </secondary >
</window-value>
```

### 4.1.5 Post Processing Configuration

The post processing configuration file stores the parameters and configuration used by the post-processing tool. It is an XML file that has to be located in the general configuration files directory, see chapter 4.1. It contains the main tag *<post-processing-config>* and a list of *<post-processings>* which contain the configurations of the plugins. A list of implemented post processing plugins is described in 4.1.5.1.

Also the configuration file contains information whether the input mmd files should be overwritten in place

<overwrite>

or new extended files should be written to the output directory

<create-new-files>

<output-directory><!--the existing output directory path --></output-directory>

</create-new-files>

Example Post Processing Configuration File:

<post-processing-config>

<create-new-files>

<output-directory><!--the existing output directory path --></output-directory>

</create-new-files>

<post-processings>

... <!-- List of plugin configurations -->

</post-processings>

</post-processing-config>

Plugins can be chained and are processed in the order they appear in the configuration file.

### 4.1.5.1 Post Processing Plugins

Each post processing plugin has its own XML signature.

#### 4.1.5.1.1 Spherical Distance Plugin

The spherical distance plugin is a post processing plugin, which can be used to add a spherical distance variable to a matchup dataset i.e. the distance of the matchup acquisitions for primary and additional sensor, calculated as geodesic distance in kilometers.

Requirements:

- The matchup dataset must contain latitude and longitude information for primary and secondary sensor.
- This geo information can be organized in 1 by 1, 3 by 3, 5 by 5 or each other odd manner.
- The matchup dataset must not contain a variable with the name, defined in <var-name> tag.

<spherical-distance>

<target>

<data-type>Float</data-type>

<var-name>post\_dist</var-name>

<dim-name>matchup\_count</dim-name>

</target>

<primary-lat-variable scaleAttrName="Scale">amsub-n16\_Latitude</primary-lat-variable>

<primary-lon-variable scaleAttrName="Scale">amsub-n16\_Longitude</primary-lon-variable>

<secondary-lat-variable>ssmt2-f14\_lat</secondary-lat-variable>

<secondary-lon-variable>ssmt2-f14\_lon</secondary-lon-variable>

</spherical-distance>

If the geo information variable contains values which must be scaled to get the real lat/lon information, in the plugin XML the names of scaling (*scaleAttrName*) and offset (*offsetAttrName*) attributes have to be supplied. The plugin scales the variables accordingly before calculating the geodesic distance. If scaling or offset attributes are defined but not available, a runtime exception will be thrown.

The primary and secondary lat/lon value will always be extracted from the center pixel.

### 4.1.5.1.2 SST Insitu Timeseries Plugin

This plugin extracts a time series from in situ data files and appends the data to the mmd file.

Requirements:

- An input mmd file must contain variables containing “\_insitu.” in its name. The part before “\_insitu.” is interpreted as the insitu sensor type.  
e.g. “gtmba-sst\_insitu.id” resolves to insitu sensor type “gtmba-sst”
- An input mmd file must contain a variable named “<insitu-sensor-type>\_file\_name” which contains the original insitu data file name per matchup
- An input mmd file must contain a dimension named “file\_name” which defines the field size of a file\_name field in the “<insitu-sensor-type>\_file\_name” variable.
- An input mmd file must contain a dimension named “matchup\_count” which defines the number of matchups in this file.

Example sst time series post processing plugin xml part:

```
<sst-insitu-time-series>
  <version>v03.3</version>
  <time-range-in-seconds>129600</time-range-in-seconds>
  <time-series-size>220</time-series-size>
  <secondary-sensor-matchup-time-variable>
    amsre.acquisition_time
  </secondary-sensor-matchup-time-variable>
</sst-insitu-time-series>
```

“version”: defines the processing version of the insitu data files. Also encodes the data archive path.

“time-range-in-seconds”: defines the complete time range extract range from the insitu acquisitions

“time-series-size”: defines the size of the extract – should match the maximum number of acquisitions possible within the extraction time range

“secondary-sensor-matchup-time-variable”: variable name for the reference times



The plugin expects that the insitu file archive is organized without year/month/day paths. This means that all the insitu files of same sensor type and version should be in one directory.

Example archive sniped from system-config.xml

```
<system-config>
  ...
  <archive>
    <root-path><!-- archive root path --></root-path>
    <rule sensors="animal-sst, gtmba-sst">insitu/SENSOR/VERSION</rule>
  </archive>
  ...
</system-config>
```

Time series variables created by the plugin:

- insitu.dtime [int] (time delta between secondary matchup time and insitu time)
- insitu.id [long] (this a unique id generated by combining YEAR, MONTH and mohc\_id)
- insitu.lat [float]
- insitu.lon [float]
- insitu.mohc\_id [int]
- insitu.sea\_surface\_temperature [float]
- insitu.sst\_depth [float]
- insitu.sst\_qc\_flag [short]
- insitu.sst\_track\_flag [short]
- insitu.sst\_uncertainty [float]
- insitu.time [int]
- insitu.y [int]

#### 4.1.5.1.3 NPW plugin

This plugin adds numerical weather prediction (NWP) data to matchup datasets. The NWP data is extracted from ERA-Interim data (<http://www.ecmwf.int/en/research/climate-reanalysis/era-interim>). The plugin allows two different processes to be executed, a time series extraction for single pixel matchups (like insitu data) or an n x m pixel extract with profile data for atmospheric parameters for satellite-sensor extracts. The plugin relies on the publicly available CDO software (<https://code.zmaw.de/projects/cdo>) to perform the time-series aggregation and projection tasks.

The parametrization for the time-series and sensor-extracts is configured in specific sub-tags, see example below.

Configuration example:

```
<nwp>
```

# FIDUCEO Multi-sensor Match up System (MMS) V 1.2

## Manual

---

```
<cdo-home>/usr/local/bin/cdo</cdo-home>
<nwp-aux-dir>/the/auxiliary/files</nwp-aux-dir>
<delete-on-exit>>true</delete-on-exit>
<temp-dir>/temp/dir</temp-dir >

<time-series-extraction>
  <analysis-steps>19</analysis-steps>
  <forecast-steps>33</forecast-steps>

  <time-variable-name>acquisition-time</time-variable-name>
  <longitude-variable-name>animal-sst_inistu.lon</longitude-variable-name>
  <latitude-variable-name>animal-sst_inistu.lat</latitude-variable-name>

  <analysis-center-time-name>matchup.nwp.an.t0</analysis-center-time-name>
  <forecast-center-time-name>matchup.nwp.fc.t0</forecast-center-time-name>

  <an-ci-name>an_sea-ice-fraction</an-ci-name>
  <an-sstk-name>an_sea-surface-temperature</an-sstk-name>
  <fc-sstk-name>fc_sea-surface-temperature</fc-sstk-name>
  <an-u10-name>an_east_wind</an-u10-name>
  <an-v10-name>an_north_wind</an-v10-name>
  <fc-u10-name>10m_east_wind_component</fc-u10-name>
  <fc-v10-name>10m_north_wind_component</fc-v10-name>
  <fc-msl-name>mean_surface_pressure</fc-msl-name>
  <fc-t2-name>2m-temperature</fc-t2-name>
  <fc-d2-name>2m_dew_point</fc-d2-name>
  <fc-tp-name>total_precipitation</fc-tp-name>
  <an-clwc-name>cloud_liquid_water_content</an-clwc-name>
  <fc-clwc-content-name>cloud_liquid_water_content</fc-clwc-name>
  <an-tcww-name>an_total_column_water_vapour</an-tcww-name>
  <fc-tcww-name>fc_total_column_water_vapour</fc-tcww-name>
  <fc-sshf-name>fc_surface_sensible_heat_flux</fc-sshf-name>
  <fc-slhf-name>surface_latent_heat_flux</fc-slhf-name>
  <fc-blh-name>boundary_layer_height</fc-blh-name>
  <fc-ssrd-name>fc_downward_surface_solar_radiation</fc-ssrd-name>
  <fc-strd-name>fc_downward_surface_thermal_radiation</fc-strd-name>
  <fc-ssr-name>fc_surface_solar_radiation</fc-ssr-name>
  <fc-str-name>fc_surface_thermal_radiation</fc-str-name>
  <fc-ewss-name>fc_turbulent_stress_east_component</fc-ewss-name>
  <fc-nsss-name>fc_turbulent_stress_north_component</fc-nsss-name>
  <fc-e-name>fc_evaporation</fc-e-name>
</time-series-extraction>

<sensor-extraction>
  <time-variable-name>acquisition_time</time-variable-name>
  <longitude-variable-name>amsre.longitude</longitude-variable-name>
  <latitude-variable-name>amsre.latitude</latitude-variable-name>

  <x-dimension>5</x-dimension>
```

```
<x-dimension-name>nwp_x</x-dimension-name>
<y-dimension>5</y-dimension>
<y-dimension-name>nwp_y</y-dimension-name>
<z-dimension>60</z-dimension>
<z-dimension-name>nwp_z</z-dimension-name>

<an-ci-name>seaice_fraction</an-ci-name>
<an-asn-name>snow_albedo</an-asn-name>
<an-sstk-name>sea_surface_temperature</an-sstk-name>
<an-tcwg-name>total_column_water_vapour</an-tcwg-name>
<an-msl-name>mean_sea_level_pressure</an-msl-name>
<an-tcc-name>total_cloud_cover</an-tcc-name>
<an-u10-name>10m_east_wind_component</an-u10-name>
<an-v10-name>north_wind</an-v10-name>
<an-t2-name>2m_temperature</an-t2-name>
<an-d2-name>2m_dew_point</an-d2-name>
<an-al-name>albedo</an-al-name>
<an-lnsp-name>log_surface_pressure</an-lnsp-name>
<an-skt-name>skin_temperature</an-skt-name>
<an-t-name>temperature_profile</an-t-name>
<an-q-name>water_vapour_profile</an-q-name>
<an-o3-name>ozone_profile</an-o3-name>
<an-clwc-name>cloud_liquid_water</an-clwc-name>
<an-ciwc-name>cloud_ice_water</an-ciwc-name>
<an-tp-name>total_precipitation</an-tp-name>
<sensor-extraction>

</nwp>
```

Configuration parameters are explained in detail below:

- “cdo-home”: denotes the absolute path to the root directory of the binary CDO operators installation.
- “nwp-aux-dir”: defines the directory where the ERA-Interim auxiliary files are located.
- “delete-on-exit”: Set whether to delete all temporary files after processing or not. Default value is: true
- “temp-dir”: sets the temporary directory to be used. The directory must exist and be writable. If not set, the standard system temporary directory is used

Configuration parameter for the time-series extraction process:

- “analysis-steps”: Defines the number of time steps around the matchup time for NWP analysis data (6 hr time resolution). Default is: 17.
- “forecast-steps”: Defines the number of time steps around the matchup time for NWP forecast data (3 hr time resolution). Default is: 33.
- “time-variable-name”: Defines the name of the time variable to use as reference time. Time variables are expected to store data in seconds since 1970 format.

# FIDUCEO Multi-sensor Match up System (MMS) V 1.2

## Manual

---

- “longitude-variable-name”: Defines the name of the longitude variable to use as reference. Data is expected in decimal degrees east.
- “latitude-variable-name”: Defines the name of the longitude variable to use as reference. Data is expected in decimal degrees north.
- “analysis-center-time-name”: Defines the name of the variable for analysis center times. Values are in seconds since 1970-01-01. Default: `matchup.nwp.an.t0`.
- “forecast-center-time-name”: Defines the name of the variable for forecast center times. Values are in seconds since 1970-01-01. Default: `matchup.nwp.fc.t0`.
- “an-ci-name”: Defines the name of the target variable for analysis sea-ice-fraction (CI). Default: `matchup.nwp.an.sea_ice_fraction`.
- “an-sstk-name”: Defines the name of the target variable for analysis sea surface temperature (SSTK). Default: `matchup.nwp.an.sea_surface_temperature`.
- “fc-sstk-name”: Defines the name of the target variable for forecast sea surface temperature (SSTK). Default: `matchup.nwp.fc.sea_surface_temperature`.
- “an-u10-name”: Defines the name of the target variable for analysis 10m east wind component (U10). Default: `matchup.nwp.an.10m_east_wind_component`.
- “an-v10-name”: Defines the name of the target variable for analysis 10m north wind component (V10). Default: `matchup.nwp.an.10m_north_wind_component`.
- “fc-u10-name”: Defines the name of the target variable for forecast 10m east wind component (U10). Default: `matchup.nwp.fc.10m_east_wind_component`.
- “fc-v10-name”: Defines the name of the target variable for forecast 10m north wind component (V10). Default: `matchup.nwp.fc.10m_north_wind_component`.
- “fc-msl-name”: Defines the name of the target variable for forecast mean sea level pressure (MSL). Default: `matchup.nwp.fc.mean_sea_level_pressure`.
- “fc-t2-name”: Defines the name of the target variable for forecast 2m temperature (T2). Default: `matchup.nwp.fc.2m_temperature`.
- “fc-d2-name”: Defines the name of the target variable for forecast 2m dew point (D2). Default: `matchup.nwp.fc.2m_dew_point`.
- “fc-tp-name”: Defines the name of the target variable for forecast total precipitation (TP). Default: `matchup.nwp.fc.total_precipitation`.
- “an-clwc-name”: Defines the name of the target variable for analysis cloud liquid water content (CLWC). Default: `matchup.nwp.an.cloud_liquid_water_content`.
- “fc-clwc-name”: Defines the name of the target variable for forecast cloud liquid water content (CLWC). Default: `matchup.nwp.fc.cloud_liquid_water_content`.
- “an-tcwg-name”: Defines the name of the target variable for analysis total column water vapour (TCWV). Default: `matchup.nwp.an.total_column_water_vapour`.
- “fc-tcwg-name”: Defines the name of the target variable for forecast total column water vapour (TCWV). Default: `matchup.nwp.fc.total_column_water_vapour`.
- “fc-sshf-name”: Defines the name of the target variable for forecast surface sensible heat flux (SSHf). Default: `matchup.nwp.fc.surface_sensible_heat_flux`.
- “fc-slhf-name”: Defines the name of the target variable for forecast latent sensible heat flux (SLHF). Default: `matchup.nwp.fc.surface_latent_heat_flux`.
- “fc-blh-name”: Defines the name of the target variable for forecast boundary layer height (BLH). Default: `matchup.nwp.fc.boundary_layer_height`.
- “fc-ssrd-name”: Defines the name of the target variable for forecast downward surface solar radiation (SSRD). Default: `matchup.nwp.fc.downward_surface_solar_radiation`.
- “fc-strd-name”: Defines the name of the target variable for forecast downward surface thermal radiation (STRD). Default: `matchup.nwp.fc.downward_surface_thermal_radiation`.

# FIDUCEO Multi-sensor Match up System (MMS) V 1.2

## Manual

---

- “fc-ssr-name”: Defines the name of the target variable for forecast surface solar radiation (SSR). Default: `matchup.nwp.fc.surface_solar_radiation`.
- “fc-str-name”: Defines the name of the target variable for forecast surface thermal radiation (STR). Default: `matchup.nwp.fc.surface_thermal_radiation`.
- “fc-ewss-name”: Defines the name of the target variable for forecast turbulent stress east component (EWSS). Default: `matchup.nwp.fc.turbulent_stress_east_component`.
- “fc-nsss-name”: Defines the name of the target variable for forecast turbulent stress north component (NSSS). Default: `matchup.nwp.fc.turbulent_stress_north_component`.

Configuration parameter for the sensor extraction process:

- “time-variable-name”: Defines the name of the time variable to use as reference time. Time variables are expected to store data in seconds since 1970 format.
- “longitude-variable-name”: Defines the name of the longitude variable to use as reference. Data is expected in decimal degrees east.
- “latitude-variable-name”: Defines the name of the longitude variable to use as reference. Data is expected in decimal degrees north.
- “x-dimension”: defines the extract window extent in x direction.
- “x-dimension-name”: defines the name of the NetCDF dimension for the x direction extent of the NWP extract.
- “y-dimension”: defines the extract window extent in y direction.
- “y-dimension-name”: defines the name of the NetCDF dimension for the y direction extent of the NWP extract.
- “z-dimension”: defines the extract window extent in z direction (i.e. atmospheric layers).
- “z-dimension-name”: defines the name of the NetCDF dimension for the z direction extent of the NWP extract.
- “an-ci-name”: Defines the name of the target variable for analysis sea-ice-fraction (CI). Default: `amsre.nwp.seaice_fraction`.
- “an-asn-name”: Defines the name of the target variable for analysis snow albedo (ASN). Default: `amsre.nwp.snow_albedo`.
- “an-sstk-name”: Defines the name of the target variable for analysis sea surface temperature (SSTK). Default: `amsre.nwp.sea_surface_temperature`.
- “an-tcwwv-name”: Defines the name of the target variable for analysis total column water vapour content (TCWV). Default: `amsre.nwp.total_column_water_vapour`.
- “an-msl-name”: Defines the name of the target variable for analysis mean sea level pressure (MSL). Default: `amsre.nwp.mean_sea_level_pressure`.
- “an-tcc-name”: Defines the name of the target variable for analysis total cloud coverage (TCC). Default: `amsre.nwp.total_cloud_cover`.
- “an-u10-name”: Defines the name of the target variable for analysis 10m east wind component (U10). Default: `amsre.nwp.10m_east_wind_component`.
- “an-v10-name”: Defines the name of the target variable for analysis 10m north wind component (V10). Default: `amsre.nwp.10m_north_wind_component`.
- “an-t2-name”: Defines the name of the target variable for analysis 2m temperature (T2). Default: `amsre.nwp.2m_temperature`.
- “an-d2-name”: Defines the name of the target variable for analysis 2m dew point (D2). Default: `amsre.nwp.2m_dew_point`.

# FIDUCEO Multi-sensor Match up System (MMS) V 1.2

## Manual

---

- “an-al-name”: Defines the name of the target variable for analysis albedo (AL). Default: `amsre.nwp.albedo`.
- “an-lnsp-name”: Defines the name of the target variable for analysis logarithmic surface pressure (LNSP). Default: `amsre.nwp.log_surface_pressure`.
- “an-skt-name”: Defines the name of the target variable for analysis skin temperature (SKT). Default: `amsre.nwp.skin_temperature`.
- “an-t-name”: Defines the name of the target variable for analysis temperature profile (T). Default: `amsre.nwp.temperature_profile`.
- “an-q-name”: Defines the name of the target variable for analysis water vapour profile (Q). Default: `amsre.nwp.water_vapour_profile`.
- “an-o3-name”: Defines the name of the target variable for analysis ozone profile (O3). Default: `amsre.nwp.ozone_profile`.
- “an-clwc-name”: Defines the name of the target variable for analysis cloud liquid water (CLWC). Default: `amsre.nwp.cloud_liquid_water`.
- “an-ciwc-name”: Defines the name of the target variable for analysis cloud ice water (CIWC). Default: `amsre.nwp.cloud_ice_water`.
- “an-tp-name”: Defines the name of the target variable for analysis total precipitation (TP). Default: `amsre.nwp.total_precip`.

### 4.1.5.1.4 Cloud Flagging for HIRS

This plugin computes and adds cloud flag data to a matchup dataset containing HIRS data.

Example plugin xml part:

```
<hirs-l1-cloudy-flags>
  <hirs-sensor-name>hirs-n18</hirs-sensor-name>
  <hirs-var-name-source-file-name>hirs-n18_file_name</hirs-var-name-source-file-name>
  <hirs-var-name-source-x>hirs-n18_x</hirs-var-name-source-x>
  <hirs-var-name-source-y>hirs-n18_y</hirs-var-name-source-y>
  <hirs-var-name-processing-version>hirs-n18_processing_version</hirs-var-name-processing-version>
  <hirs-var-name-source-11_1-um>bt_ch08</hirs-var-name-source-11_1-um>
  <hirs-var-name-cloud-flags>hirs-n18_cloudy_flags</hirs-var-name-cloud-flags>
  <hirs-var-name-latitude>hirs-n18_lat</hirs-var-name-latitude>
  <hirs-var-name-longitude>hirs-n18_lon</hirs-var-name-longitude>
  <hirs-var-name-11_1-um>hirs-n18_bt_ch08</hirs-var-name-11_1-um>
  <hirs-var-name-6_5-um>hirs-n18_bt_ch12</hirs-var-name-6_5-um>
  <distance-product-file-path>/path/to/the/distance-NetCDF-file.nc</distance-product-file-path>
</hirs-l1-cloudy-flags>
```

The plugin differentiates three matchup scenes:

- “water”
- “ice covered water”
- “land”

# FIDUCEO Multi-sensor Match up System (MMS) V 1.2

## Manual

---

In the case of a “water” scene, it is needed to reopen the source orbit and extract a 45 x 45 pixels area around the center position of the current matchup.

Therefore this list of parameters is needed:

- `<hirs-sensor-name>`  
The sensor name, which was used to ingest the input product to the database.
- `<hirs-var-name-source-file-name>`  
The name of the MMD variable, which contains the source filename of the input file
- `<hirs-var-name-source-x>`  
The name of the MMD variable, which contains the source center pixel **x** of the matchup
- `<hirs-var-name-source-y>`  
The name of the MMD variable, which contains the source center pixel **y** of the matchup
- `<hirs-var-name-processing-version>`  
The processing version, which was used to ingest the input product to the database.
- `<hirs-var-name-source-11_1-um>`  
The name of the 11,1 $\mu$ m brightness temperature variable of the source file

In the cases “ice covered water” or “land” the plugin can compute the flags without extraction of data from the source product.

The following list of parameters are effective for all cases.

```
<hirs-var-name-cloud-flags>hirs-n18_cloudy_flags</hirs-var-name-cloud-flags>  
<hirs-var-name-latitude>hirs-n18_lat</hirs-var-name-latitude>  
<hirs-var-name-longitude>hirs-n18_lon</hirs-var-name-longitude>  
<hirs-var-name-11_1-um>hirs-n18_bt_ch08</hirs-var-name-11_1-um>  
<hirs-var-name-6_5-um>hirs-n18_bt_ch12</hirs-var-name-6_5-um>  
<distance-product-file-path>/path/to/the/distance-NetCDF-file.nc</distance-product-file-path>
```

## 5 MMD file format

TODO

### 5.1 Global Attributes

#### 5.1.1 sensor-name

A comma separated list of sensor names. The first name is the name of the primary sensor.

### 5.2 Extra MMD Variables

#### 5.2.1 <sensor-name>\_x

#### 5.2.2 <sensor-name>\_y

#### 5.2.3 <sensor-name>\_file\_name

#### 5.2.4 <sensor-name>\_processing\_version

Contains the processing version of the original sensor data file.

#### 5.2.5 <sensor-name>\_acquisition\_time

## 6 Installation and Operation on CEMS

This chapter covers the installation and operation of the FiduCEO MMS on the parallel processing facility JASMIN/CEMS supplied by CEDA. The FiduCEO project has a specific virtual machine assigned on the CEMS system for operations.

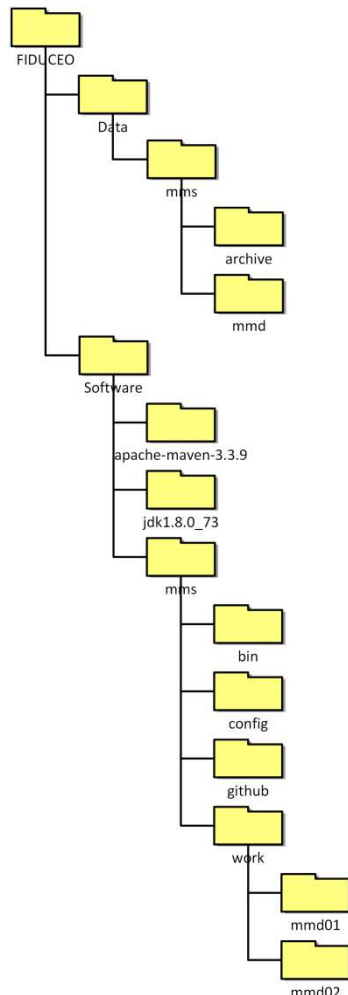

### 6.1 Workspace Structure

This chapter describes the FiduCEO workspace directory structure and the way the MMS is embedded into it. The sketches omit all non-MMS-related directories for a more clear view of the workspace structure.

The directory branch below “Data” contains a subdirectory for the “mms” that contains MMS related data. The “archive” directory contains all sensor and in-situ input data ordered in the directory structure described in the MMS Implementation Plan (see RD 1) whereas the directory “mmd” serves as target directory for the processing results. Subdirectories for each use-case will be generated during the processing of matchups.

The directories below “Software” contain all software comprising the MMS and also all third-party software used to build and run the MMS. Subdirectories “apache-maven-3.3.9” and “jdk1.8.0\_73” contain the apache maven build manager and the Java JDK/runtime required to compile and run the MMS.



# FIDUCEO Multi-sensor Match up System (MMS) V 1.2

## Manual

---

The subdirectory “mms” contains all MMS related software, configuration, a build directory and a set of working directories. The current operating version of the MMS is contained in the directory “bin”. The configuration files used by the MMS are stored in the directory “config”.

The subdirectory “github” is the build directory. It contains the complete source code of the MMS and is configured to be able to fetch code changes from github and to build and deploy the software.

In the “work” directory contained are the working directories for processing. Any processing job needs to be operated from a dedicated sub-directory of “work”. Each subdirectory for a specific use-case processing contains status files, log-directories and all other files required by PMonitor to operate.

## 6.2 Building the MMS on CEMS

The build and deployment process is mostly automated. To build and deploy “master” branch (i.e. the latest development version) of the github repository, change to the directory “FIDUCEO/Software/mms/github/fiduceo” and invoke the script “build\_and\_install\_on\_cems.sh”. This script performs the following steps:

- Checkout the latest version of the code from github
- Invoke maven to build the code and run all tests
- Clean up the “bin” directory
- Invoke maven to build an assembly of the binaries and deploy it to the “bin” directory.

When these steps have been run successfully, the MMS software is ready to operate.

## 6.3 Operating the MMS on CEMS

This chapter covers all information with respect to operations of the MMS on the CEMS environment and specific configuration and set-up tasks.

### 6.3.1 Setting up the environment

Before the MMS is able to operate on the LOTUS cluster, a number of environment variables and paths need to be set. This is done by simply sourcing a pre-configured script.

Assuming that you are in a use-case subdirectory e.g. in “FIDUCEO/Software/mms/work/mmd08” sourcing the environment file is accomplished by executing:

```
[tblock01@lotus mmd08]$ ../../bin/mms-env.sh
```

The script file is automatically installed to the directory “FIDUCEO/Software/mms/bin” by the maven deployment script.

## 6.3.2 CEMS Specific Configuration

The CEMS environment requires a number of specific configuration settings that ensure the proper operation on the cluster. All configuration files accessed by the operational MMS are located in the directory “FIDUCEO/Software/mms/config”.

**IMPORTANT:** The configuration files in this directory will not be updated by the MMS build and deploy procedure. Any changes in the file content, e.g. additional fields or field renaming, have to be inserted manually into the operational configuration.

### 6.3.2.1 System Configuration

The MMS system configuration is set up to pick up the correct input data archive path for the CEMS installation. The following setting is mandatory on CEMS:

**archive-root:** /group\_workspaces/cems2/fiduceo/Data/mms/archive

For a description of the system configuration file, please refer to chapter 4.1.1.

### 6.3.2.2 Database Configuration

The database installed on the Fiduceo workspace is a MongoDB server installation, version 3.2. This database requires a fixed set of access configuration parameters for the database configuration:

**driverClassName:** mongodb

**url:** mongodb://172.26.69.130:27017/FIDUCEO

**username:** xxxx

**password:** xxxx

Username and password are available on request. For a description of the database configuration file, please refer to chapter 4.1.2.

## 6.3.3 Operating the MMS

On the parallel processing environment on the LOTUS cluster, the MMS software is controlled by an additional Python layer, PMonitor. This software layer controls the deployment and parallel execution of MMS-Tool processes (Ingestion, Matchup, Post Processing) to the cluster nodes. It ensures that processing can be paused and re-invoked and that on e.g. hardware or network failures, large processing jobs can safely continue where they have been interrupted.

PMonitor is invoked from the console on the lotus VM using three shell scripts that are located in the directory “FIDUCEO/Software/mms/bin” – and that are automatically available on the path when the environment is set up correctly following the instructions in chapter 6.3.1.

**pmstart.sh:** this command is used to submit a parallel processing task to the cluster. It assumes a single cmd-line argument, the name of the workflow-file that contains the process description, e.g.

“pmstart.sh ingest\_avhrr\_n07.py”.

**pmstop.sh:** this command stops the execution of parallel tasks and kills the currently running processes on LOTUS. PMonitor ensures that the processing can later pick up processing at the point where the job has been stopped. It assumes a single cmd-line argument, the name of the workflow-file that contains the process description, e.g.

“pmstop.sh ingest\_avhrr\_n11.py”.

**pmclean.sh:** this command cleans up all temporary files that have been generated during the processing execution. It assumes a single cmd-line argument, the name of the workflow that has been processed, e.g.

“pmclean ingest\_avhrr\_m02”.

The shell scripts are designed in a way that it is safe to close the console after a processing job has been started. Processing will keep on running in the background.

### 6.3.4 Workflow Files

The definition of the jobs to be executed by PMonitor is stored in workflow files. These are Python files that create and configure a workflow object, which is using PMonitor to execute the parallel processing on the cluster. Workflow files are available from and have to be stored into the directory “FIDUCEO/Software/mms/bin/python”.
